# Supplementary material for: Health-Related Quality of Life in Patients with Chronic Myeloid Leukemia Treated with First- Versus Second-Generation Tyrosine Kinase Inhibitors
Source: MDPI journal article supplement (doi:10.3390/jcm9113417), 2020-10-25
Supplement: s1 [file s1]

**Supplementary data 1**

Code \_\_\_\_\_

Opening page for the research

Greetings,

This research study was initiated at the Davidoff Cancer Center, Rabin Medical Center, in cooperation with the CML patient organization with the purpose to learn from you, our patients, how the disease and treatment affects your quality of life. We assume most or all of you are treated with one of the customary medications: Imatinib, Dasatinib, Nilotinib, Bosutinib and Ponatinib.

In the questionnaire before you, are questions regarding the disease, the treatment's side effects, the physical and emotional coping with this state and finally, demographic questions. If you do not feel comfortable answering certain questions, please feel free to skip any of them. This questionnaire should take you approximately 15 minutes to complete.

Responding to this questionnaire provides us with the necessary consent by you to participate in this research project.

If you have stopped treatment, please answer only the relevant questions and state that you have stopped treatment.

The data will be coded and kept by the principal investigators, Dr. Adi Shacham and Dr. Uri Rozovski until the study is completed.

In addition to answering the questionnaire, if the medical center in which you are treated will consent to participate in the study and if the study is approved by your institution review board, we will collect more data from your medical record (demographic details, CML disease data, comorbidities, the course of the disease (CML) and the treatments you received, side effects, response to treatment and laboratory data).

The data will be collected by a research coordinator who will be appointed by our research team (Davidoff Cancer Center at Rabin Medical Center and the CML patient organization). Collection and maintenance of the data will be encrypted (coded) and will be kept by the principal investigators, Dr. Adi Shacham and Dr. Uri Rozovski until the study is completed.

If the medical center you are caring for will not consent to the study, we can only use data from the questionnaires. In any case, at any stage of filling out the questionnaire or participating in the study, you can stop or quit your participation in the research.

In any research related matter you can contact Dr. Adi Shacham, at 03-9378008/9, hematological institute secretary.

Thank you very much for participating in the study!

- Dr. Adi Shacham, Hematology, Rabin Medical Center
- Dr. Uri Rozovski, Hematology, Rabin Medical Center
- Giora Sherf

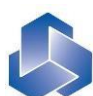**EORTC QLQ-C30 version(3)**

We are interested in some things about you and your health. Please answer all of the questions yourself by circling the number that best applies to you. There are no "right" or "wrong" answers. The information that you provide will remain strictly confidential

Please fill in your initials:  
 Your birthdate (Day, Month, Year):  
 Today's date (Day, Month, Year):

|                                                                                                          | Not at<br>All | A<br>Little | Quite a<br>Bit | Very<br>Much |
|----------------------------------------------------------------------------------------------------------|---------------|-------------|----------------|--------------|
| 1. Do you have any trouble doing strenuous activities, like carrying a heavy shopping bag or a suitcase? | 1             | 2           | 3              | 4            |
| 2. Do you have any trouble taking a <u>long</u> walk?                                                    | 1             | 2           | 3              | 4            |
| 3. Do you have any trouble taking a <u>short</u> walk outside of the house?                              | 1             | 2           | 3              | 4            |
| 4. Do you need to stay in bed or a chair during the day?                                                 | 1             | 2           | 3              | 4            |
| 5. Do you need help with eating, dressing, washing yourself or using the toilet?                         | 1             | 2           | 3              | 4            |

**During the past week:**

|                                                                                | Not at<br>All | A<br>Little | Quite a<br>Bit | Very<br>Much |
|--------------------------------------------------------------------------------|---------------|-------------|----------------|--------------|
| 6. Were you limited in doing either your work or other daily activities?       | 1             | 2           | 3              | 4            |
| 7. Were you limited in pursuing your hobbies or other leisure time activities? | 1             | 2           | 3              | 4            |
| 8. Were you short of breath?                                                   | 1             | 2           | 3              | 4            |
| 9. Have you had pain?                                                          | 1             | 2           | 3              | 4            |
| 10. Did you need to rest?                                                      | 1             | 2           | 3              | 4            |
| 11. Have you had trouble sleeping?                                             | 1             | 2           | 3              | 4            |
| 12. Have you felt weak?                                                        | 1             | 2           | 3              | 4            |
| 13. Have you lacked appetite?                                                  | 1             | 2           | 3              | 4            |
| 14. Have you felt nauseated?                                                   | 1             | 2           | 3              | 4            |
| 15. Have you vomited?                                                          | 1             | 2           | 3              | 4            |
| 16. Have you been constipated?                                                 | 1             | 2           | 3              | 4            |



© Copyright 1995 EORTC Quality of Life Group. All rights reserved.  
Version 3.

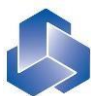

### EORTC QOL-CML24

Patients sometimes report that they have the following symptoms or problems. Please indicate the extent to which you have experienced these symptoms or problems during the past week. Please answer by circling the number that best applies to you.

---

—

| <b>During the past week:</b>                                                                                 |                       |                     |                        |                      |
|--------------------------------------------------------------------------------------------------------------|-----------------------|---------------------|------------------------|----------------------|
|                                                                                                              | <b>Not at<br/>All</b> | <b>A<br/>Little</b> | <b>Quite a<br/>Bit</b> | <b>Very<br/>Much</b> |
| 31. Have you had abdominal pains or cramps?                                                                  | 1                     | 2                   | 3                      | 4                    |
| 32. Have you had a dry mouth?                                                                                | 1                     | 2                   | 3                      | 4                    |
| 33. Have you been concerned about changes in your weight?                                                    | 1                     | 2                   | 3                      | 4                    |
| 34. Have you had skin problems (e.g. color changes, itchy, dry or flaking skin)?                             | 1                     | 2                   | 3                      | 4                    |
| 35. Have you had headaches?                                                                                  | 1                     | 2                   | 3                      | 4                    |
| 36. Have you had aches or pains in your muscles or joints?                                                   | 1                     | 2                   | 3                      | 4                    |
| 37. Have you had hair loss?                                                                                  | 1                     | 2                   | 3                      | 4                    |
| 38. Have you sweated?                                                                                        | 1                     | 2                   | 3                      | 4                    |
| 39. Have you had acid indigestion or heartburn?                                                              | 1                     | 2                   | 3                      | 4                    |
| 40. Have you felt drowsy?                                                                                    | 1                     | 2                   | 3                      | 4                    |
| 41. Have you experienced any swelling in certain parts of your body (e.g. ankles, legs or around your eyes)? | 1                     | 2                   | 3                      | 4                    |
| 42. Have you had to urinate frequently?                                                                      | 1                     | 2                   | 3                      | 4                    |
| 43. Have you had problems with your eyes                                                                     | 1                     | 2                   | 3                      | 4                    |

|                                           |   |   |   |   |
|-------------------------------------------|---|---|---|---|
| (e.g. burning, watery, irritated or dry)? |   |   |   |   |
| 44. Have you had muscle cramps?           | 1 | 2 | 3 | 4 |

**During the past week:**

|                                                                                                                                 | Not at<br>All | A<br>Little | Quite a<br>Bit | Very<br>Much |
|---------------------------------------------------------------------------------------------------------------------------------|---------------|-------------|----------------|--------------|
| 45. Have you had emotional ups and downs?                                                                                       | 1             | 2           | 3              | 4            |
| 46. Have you worried about your future health?                                                                                  | 1             | 2           | 3              | 4            |
| 47. Have you had any difficulties carrying on with<br>your usual activities<br>because of getting tired easily?                 | 1             | 2           | 3              | 4            |
| 48. Have you worried about getting an infection?                                                                                | 1             | 2           | 3              | 4            |
| 49. Have you felt dissatisfied with your body as<br>result<br>of the disease or treatment?                                      | 1             | 2           | 3              | 4            |
| 50. How much has your treatment been a burden to<br>you?                                                                        | 1             | 2           | 3              | 4            |
| 51. Have you needed social support (e.g. family,<br>friends<br>or relatives) to undergo therapy or to cope with<br>the disease? | 1             | 2           | 3              | 4            |
| 52. Have you felt satisfied with the care you have<br>received?                                                                 | 1             | 2           | 3              | 4            |
| 53. Have you felt satisfied with the information you<br>have received<br>(e.g. about the disease and its treatment)?            | 1             | 2           | 3              | 4            |
| 54. Have you felt satisfied with the quality of your<br>social life<br>(including family and/ or friends)?                      | 1             | 2           | 3              | 4            |

© Copyright 2011 EORTC Quality of Life Group. All rights reserved. Phase IV

Have you been suffering from the following symptoms since you started your current drug treatment for CML?

| Circle the answer that suits you the most | Not at<br>All | A<br>Little | Quite a<br>Bit | Very<br>Much |
|-------------------------------------------|---------------|-------------|----------------|--------------|
|-------------------------------------------|---------------|-------------|----------------|--------------|

|                                                                                                                                     |           |         |     |           |
|-------------------------------------------------------------------------------------------------------------------------------------|-----------|---------|-----|-----------|
| 1. Anxiety?                                                                                                                         | 1         | 2       | 3   | 4         |
| 2. Has your work performance been impaired?                                                                                         | 1         | 2       | 3   | 4         |
| 3. Has your function at home been impaired?                                                                                         | 1         | 2       | 3   | 4         |
| 4. Has your sexual function been impaired?                                                                                          | 1         | 2       | 3   | 4         |
| 5. Has the CML disease or its treatment affected family planning<br>(for example - pregnancy timing or number of children)?         | 1         | 2       | 3   | 4         |
| 6. Have you started follow up at a cardiovascular /vascular<br>/respiratory /neurology clinic?                                      |           | Yes     | No  |           |
| 7. Have you suffered from breathing difficulty due to<br>fluid accumulation in your lung?                                           |           | Yes     | No  |           |
| 8. How many times have you been hospitalized in the past six months? _____                                                          |           |         |     |           |
| 9. How many times have you had to cancel plans during the past month because of your illness or treatment? _____                    |           |         |     |           |
| 10. Do you use medical cannabis?                                                                                                    |           |         | Yes | No        |
| 11. How many days during the past week did you use cannabis? _____                                                                  |           |         |     |           |
| 12. How many days during the past week have you used painkillers (except cannabis)? _____                                           |           |         |     |           |
| 13. In your opinion, how many times have you missed a dose of your drug for CML in the last month? _____                            |           |         |     |           |
| 14. Have you missed one or more doses of the drug for CML in the past week?                                                         |           |         | Yes | No        |
| 15. How would you rate your <u>overall health</u> over the past <u>three months</u> ?                                               |           |         |     |           |
| 1                                                                                                                                   | 2         | 3       | 4   | 5         |
| 6                                                                                                                                   | 7         |         |     |           |
| Very poor                                                                                                                           |           |         |     | Excellent |
| 16. How would you rate your overall <u>quality of life</u> in the past <u>three months</u> ?                                        |           |         |     |           |
| 1                                                                                                                                   | 2         | 3       | 4   | 5         |
| 6                                                                                                                                   | 7         |         |     |           |
| Very poor                                                                                                                           |           |         |     | Excellent |
| 17. In relation to the previous question, how much of your quality of life would you attribute to the CML disease or its treatment? |           |         |     |           |
| Not at all                                                                                                                          | A Little  | Quite a |     |           |
| Bit                                                                                                                                 | Very much |         |     |           |
| In what way has your life changed since the discovery of the disease? Open question                                                 |           |         |     |           |
| _____                                                                                                                               |           |         |     |           |
| _____                                                                                                                               |           |         |     |           |
| _____                                                                                                                               |           |         |     |           |
| _____                                                                                                                               |           |         |     |           |

We will be happy to receive comments about the questionnaire

---



---



---



---



---

We will be happy to receive more relevant information you would like to share

---



---



---



---



---



---

### Demographic details

1. Date of birth \_\_\_\_\_
2. Country of birth \_\_\_\_\_
3. Gender                      Male                      Female
4. Family status              Single                      Married                      Widower
5. Number of children \_\_\_\_\_
6. Degree of religiosity      Secular                      Traditional                      Religious                      Orthodox
7. Elementary school education      Yes      Partial                      No
8. High school education                      Yes      Partial                      No
9. Academic education                      First degree                      Second degree or more  
No
10. City of living \_\_\_\_\_

### Detail regarding the CML disease

1. Estimated date of diagnosis \_\_\_\_\_
2. What drug are you currently treated with?

|           |                   |                     |           |           |           |
|-----------|-------------------|---------------------|-----------|-----------|-----------|
| Imatinib  |                   |                     | Nilotinib | Bosutinib | Ponatinib |
| (generic) | Glivec (original) | Dasatinib (Sprycel) | (Tasigna) | (Bosulif) | (Iclusig) |

3. When did you start receiving the drug? estimated date \_\_\_\_\_
4. Are you on a break, i.e do not receive tyrosine kinase inhibitors? Yes No
5. If you are on a treatment break, how many months are you off treatment? \_\_\_\_\_
6. As far as you know, have you reached a good response to the current treatment? Yes  
Partial No
7. Have you received any prior medication before the current treatment?
8. If so, what drugs? Check one or more of the options

|                       |                   |                     |                        |                        |                        |
|-----------------------|-------------------|---------------------|------------------------|------------------------|------------------------|
| Imatinib<br>(generic) | Glivec (original) | Dasatinib (Sprycel) | Nilotinib<br>(Tasigna) | Bosutinib<br>(Bosulif) | Ponatinib<br>(Iclusig) |
|-----------------------|-------------------|---------------------|------------------------|------------------------|------------------------|

9. As far as you know, why was the previous treatment been replaced?
- Side effects Resistance Inadequate response
10. Are you satisfied with the treatment you are currently receiving?
- Very Quite pleased Moderately satisfied Unsatisfied



**Identifying information**

First name \_\_\_\_\_

Last name \_\_\_\_\_

ID number \_\_\_\_\_

Hospital \_\_\_\_\_

Treating hematologist \_\_\_\_\_

Thank you very much for your cooperation
